# Supplementary material
Source: HighWire-hosted journal article supplement (https://dmd.aspetjournals.org/highwire/filestream/75661/field_highwire_adjunct_files/0/111_supplemental_data.pdf)

## **Supplemental Data**

**Article title:** Evaluation of in vitro models for assessment of human intestinal metabolism in drug discovery

**Authors:** Mari Davies, Prabha Peramuhendige, Lloyd King, Melanie Golding, Apoorva Kotian, Mark Penney, Syeda Shah, and Nenad Manevski

**Journal Title:** Drug Metabolism and Disposition

**Manuscript Number:** DMD-AR-2020-000111

## Supplementary tables

**Supplementary Table 1.** Measured  $f_{u,inc}$  values of test compounds using human intestinal microsomes (n = 15), permeabilized enterocytes (n = 32), and intestinal mucosa (n = 8) and their respective observed *in vivo*  $f_g$  value. The  $f_{u,inc}$  values were measured at 10  $\mu$ M of the substrate after 4 h of equilibration with the RED device.

| Test compound        | Observed human $f_g$ value | $f_{u,inc}$ values measured by RED device |                           |                      | Mean |
|----------------------|----------------------------|-------------------------------------------|---------------------------|----------------------|------|
|                      |                            | Intestinal microsomes                     | Permeabilized enterocytes | Cryopreserved mucosa |      |
| Dabigatran-etexilate | 0.05                       | NM <sup>2</sup>                           | 1.00                      | NM <sup>2</sup>      | 1.00 |
| Raloxifene           | 0.05                       | 0.15                                      | 0.21                      | 0.26                 | 0.21 |
| Testosterone         | 0.05                       | 0.74                                      | 1.00                      | NM <sup>2</sup>      | 0.87 |
| Lovastatin           | 0.07                       | 0.25                                      | 0.25                      | NM <sup>2</sup>      | 0.25 |
| Nisoldipine          | 0.11                       | 0.24                                      | 0.18                      | 0.42                 | 0.28 |
| Buspirone            | 0.18                       | 0.80                                      | 0.93                      | NM <sup>2</sup>      | 0.87 |
| Rifabutin            | 0.21                       | 0.49                                      | 0.48                      | 0.67                 | 0.55 |
| Saquinavir           | 0.28                       | 0.17                                      | 0.11                      | NM <sup>2</sup>      | 0.14 |
| Simvastatin          | 0.29                       | NM <sup>2</sup>                           | 0.48                      | NM <sup>2</sup>      | 0.48 |
| Atorvastatin         | 0.40                       | NM <sup>2</sup>                           | 0.69                      | NM <sup>2</sup>      | 0.69 |
| Terfenadine          | 0.40                       | NM <sup>2</sup>                           | 0.05                      | NM <sup>2</sup>      | 0.05 |
| Felodipine           | 0.42                       | 0.07                                      | 0.03                      | 0.00                 | 0.03 |
| Cyclosporin          | 0.48                       | 0.02                                      | 0.01                      | 0.05                 | 0.03 |
| Midazolam            | 0.55                       | 0.74                                      | 0.74                      | 0.71                 | 0.73 |
| Cisapride            | 0.57                       | 0.54                                      | 0.57                      | NM <sup>2</sup>      | 0.56 |
| Ramipril             | 0.59                       | NM <sup>2</sup>                           | 1.00                      | NM <sup>2</sup>      | 1.00 |
| Verapamil            | 0.60                       | 0.69                                      | 0.54                      | NM <sup>2</sup>      | 0.62 |
| Sildenafil           | 0.62                       | NM <sup>2</sup>                           | 1.00                      | NM <sup>2</sup>      | 1.00 |
| Nifedipine           | 0.71                       | NM <sup>2</sup>                           | 0.88                      | NM <sup>2</sup>      | 0.88 |
| Diclofenac           | 0.78                       | 0.88                                      | 0.91                      | 1.00                 | 0.93 |
| Methadone            | 0.78                       | NM <sup>2</sup>                           | 0.80                      | NM <sup>2</sup>      | 0.80 |
| Zolpidem             | 0.79                       | NM <sup>2</sup>                           | 0.92                      | NM <sup>2</sup>      | 0.92 |
| Trazodone            | 0.83                       | NM <sup>2</sup>                           | 0.85                      | NM <sup>2</sup>      | 0.85 |
| Repaglinide          | 0.89                       | NM <sup>2</sup>                           | 0.56                      | NM <sup>2</sup>      | 0.56 |
| Quinidine            | 0.91                       | NM <sup>2</sup>                           | 1.00                      | NM <sup>2</sup>      | 1.00 |
| Indinavir            | 0.93                       | 0.82                                      | 0.70                      | NM <sup>2</sup>      | 0.76 |
| Alprazolam           | 0.94                       | 0.93                                      | 0.91                      | 0.96                 | 0.93 |
| Enalapril            | 0.97                       | NM <sup>2</sup>                           | 0.74                      | NM <sup>2</sup>      | 0.74 |
| Benzydamine          | 0.98                       | NM <sup>2</sup>                           | 0.54                      | NM <sup>2</sup>      | 0.54 |
| Carbazeran           | 1.00                       | NM <sup>2</sup>                           | 1.00                      | NM <sup>2</sup>      | 1.00 |
| S-Mephenytoin        | 1.00                       | NM <sup>2</sup>                           | 0.95                      | NM <sup>2</sup>      | 0.95 |
| Terbutaline          | NA <sup>1</sup>            | NM <sup>2</sup>                           | 1.00                      | NM <sup>2</sup>      | 1.00 |

<sup>1</sup> – Insufficient amount of information in the literature to calculate  $f_g$

<sup>2</sup> –  $f_{u,inc}$  not measured. As the  $f_{u,inc}$  was similar across all three models, the  $f_{u,inc}$  for all compounds was determined in permeabilized enterocytes and applied across all three models

## Supplementary figures

**Supplementary Fig. 1.**  $CL_{int}$  measurements for midazolam, testosterone, diclofenac, raloxifene, trazodone, and buspirone in human intestinal microsomes ( $\blacklozenge$ ), permeabilized enterocytes ( $\bullet$ ), and mucosa ( $\blacksquare$ ), respectively.

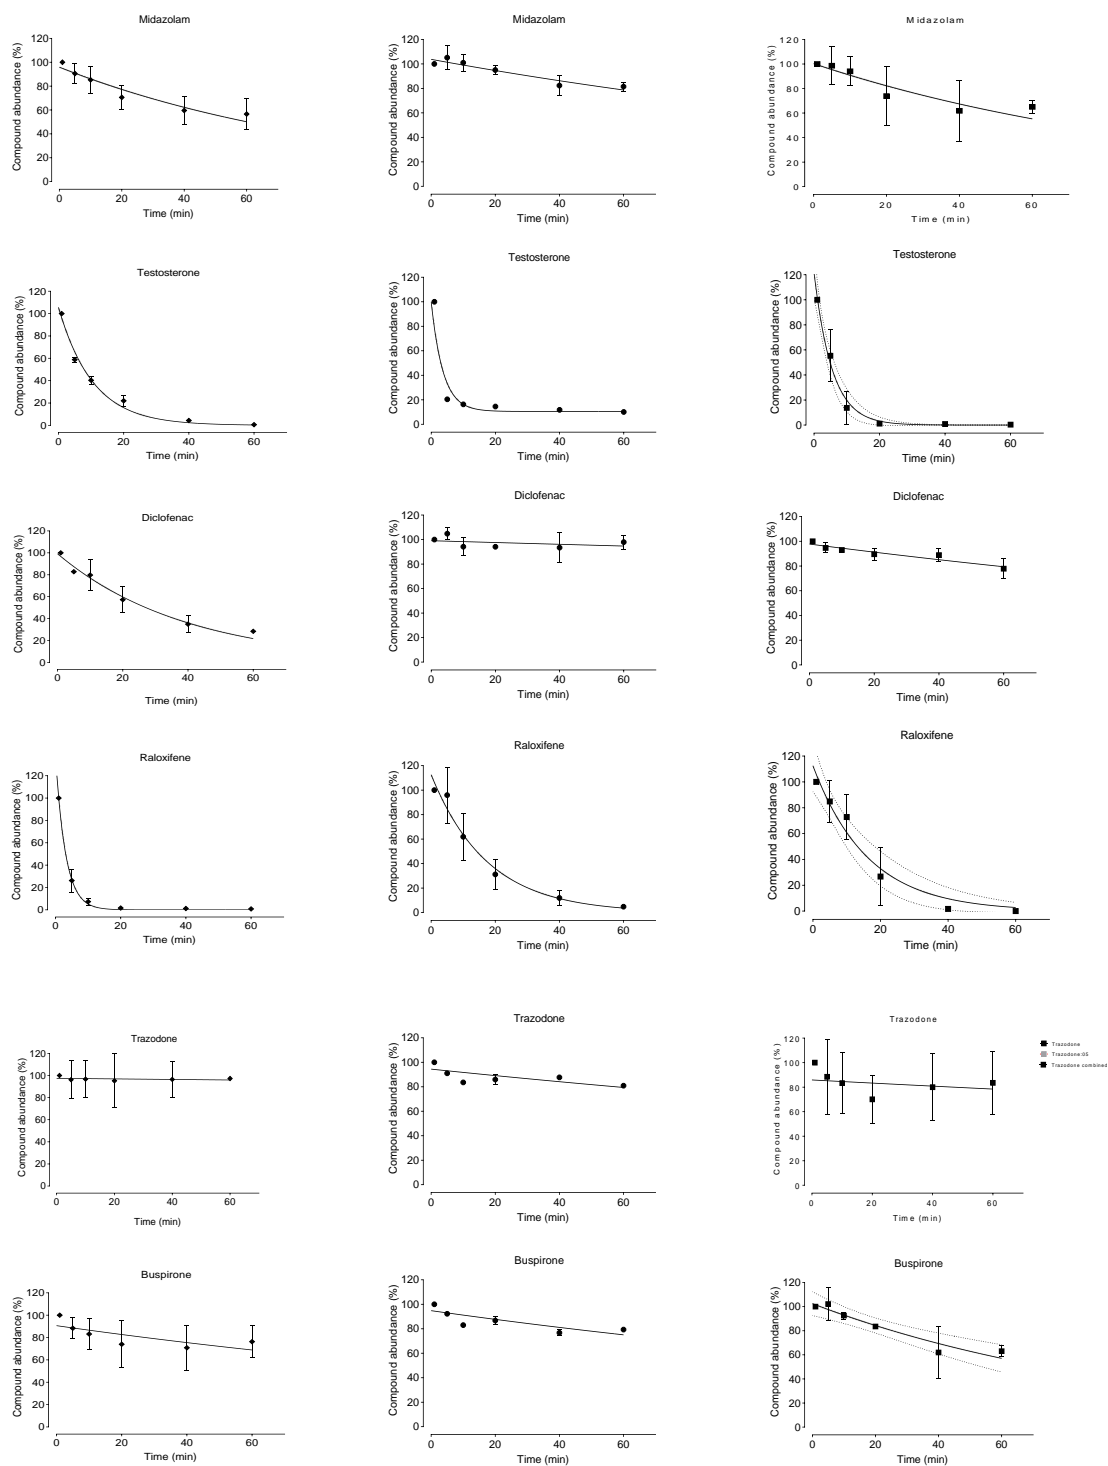

**Supplementary Fig. 2.**  $CL_{int}$  measurements for lovastatin, simvastatin, rifabutin, methadone, saquinavir, and indinavir in human intestinal microsomes (◆), permeabilized enterocytes (●), and mucosa (■), respectively.

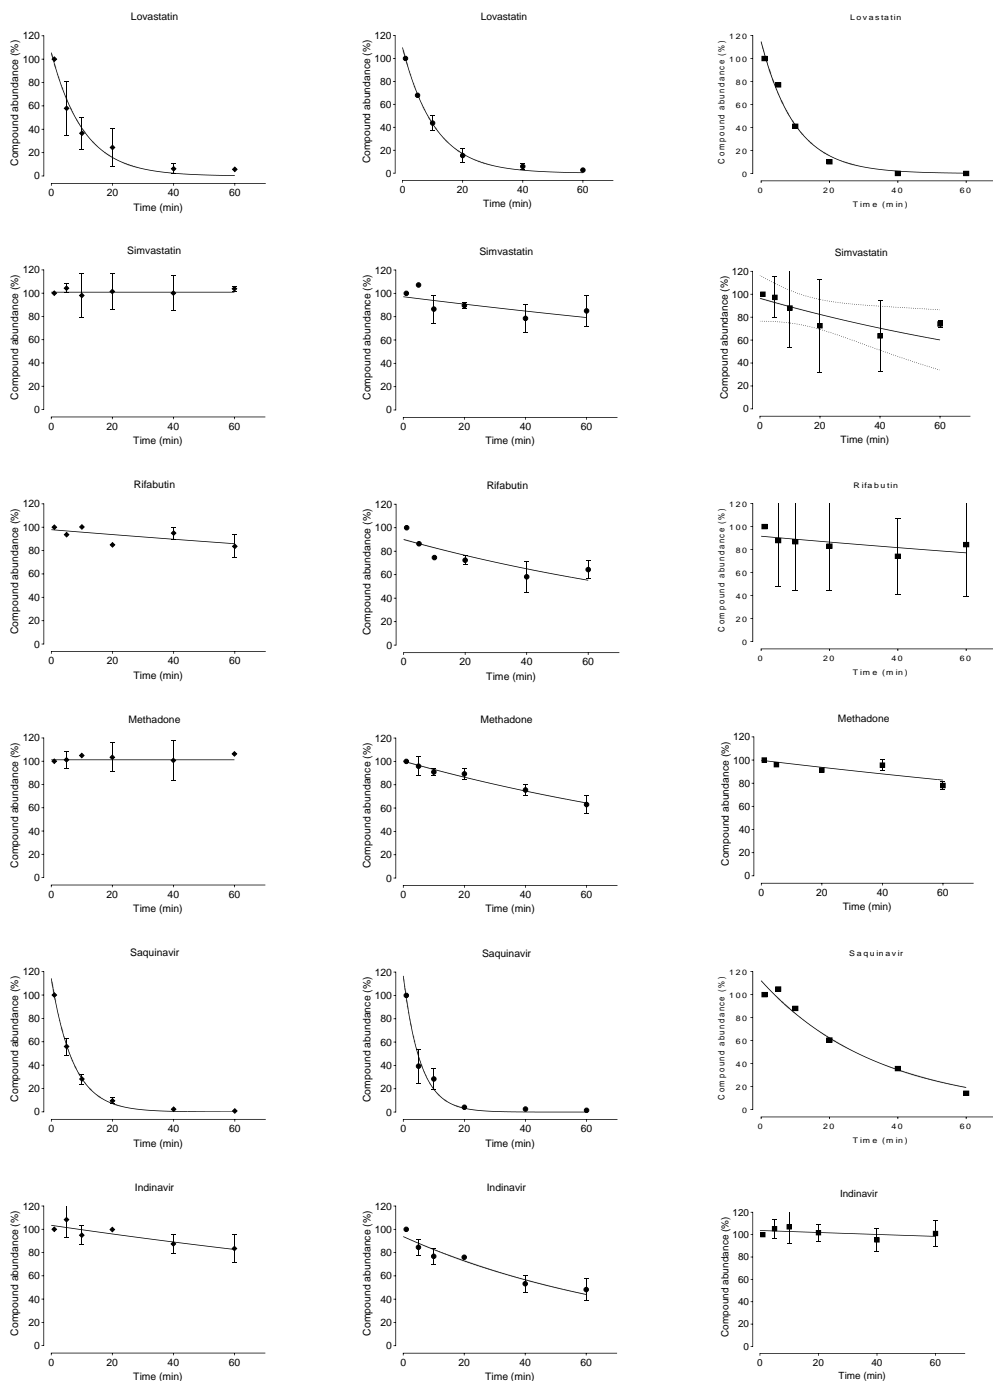

**Supplementary Fig. 3.**  $CL_{int}$  measurements for alprazolam, atorvastatin, nifedipine, zolpidem, benzydamine, and cisapride in human intestinal microsomes (◆), permeabilized enterocytes (●), and mucosa (■), respectively.

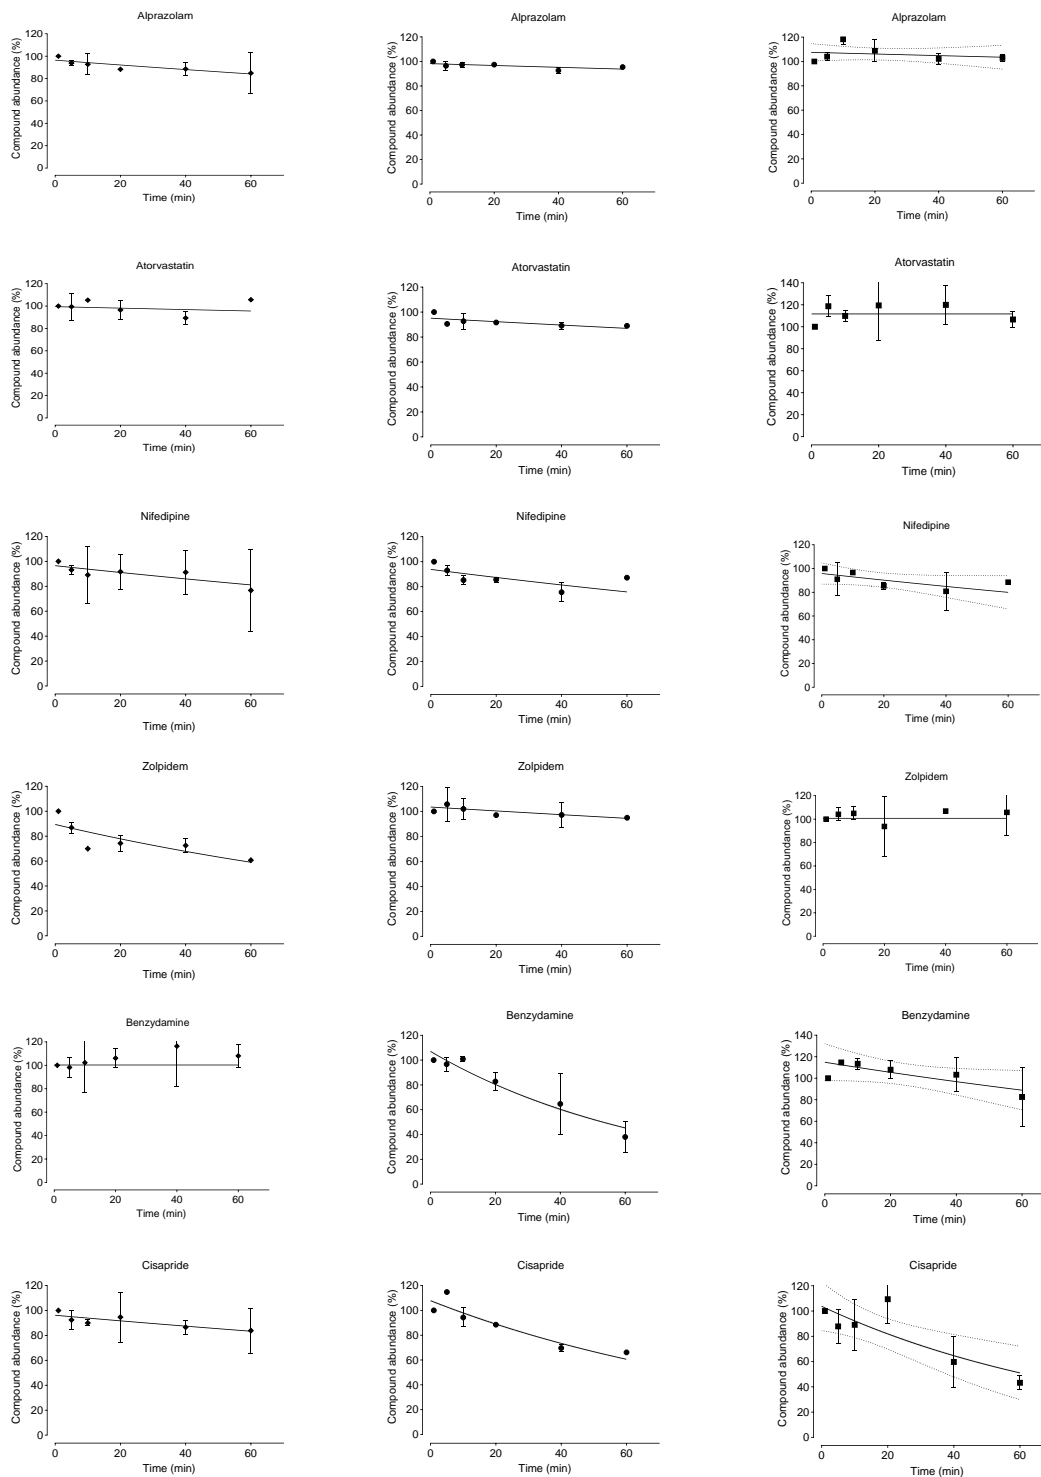

**Supplementary Fig. 4.**  $CL_{int}$  measurements for nisoldipine, sildenafil, terfenadine, felodipine, cyclosporin, and verapamil in human intestinal microsomes ( $\blacklozenge$ ), permeabilized enterocytes ( $\bullet$ ), and mucosa ( $\blacksquare$ ), respectively.

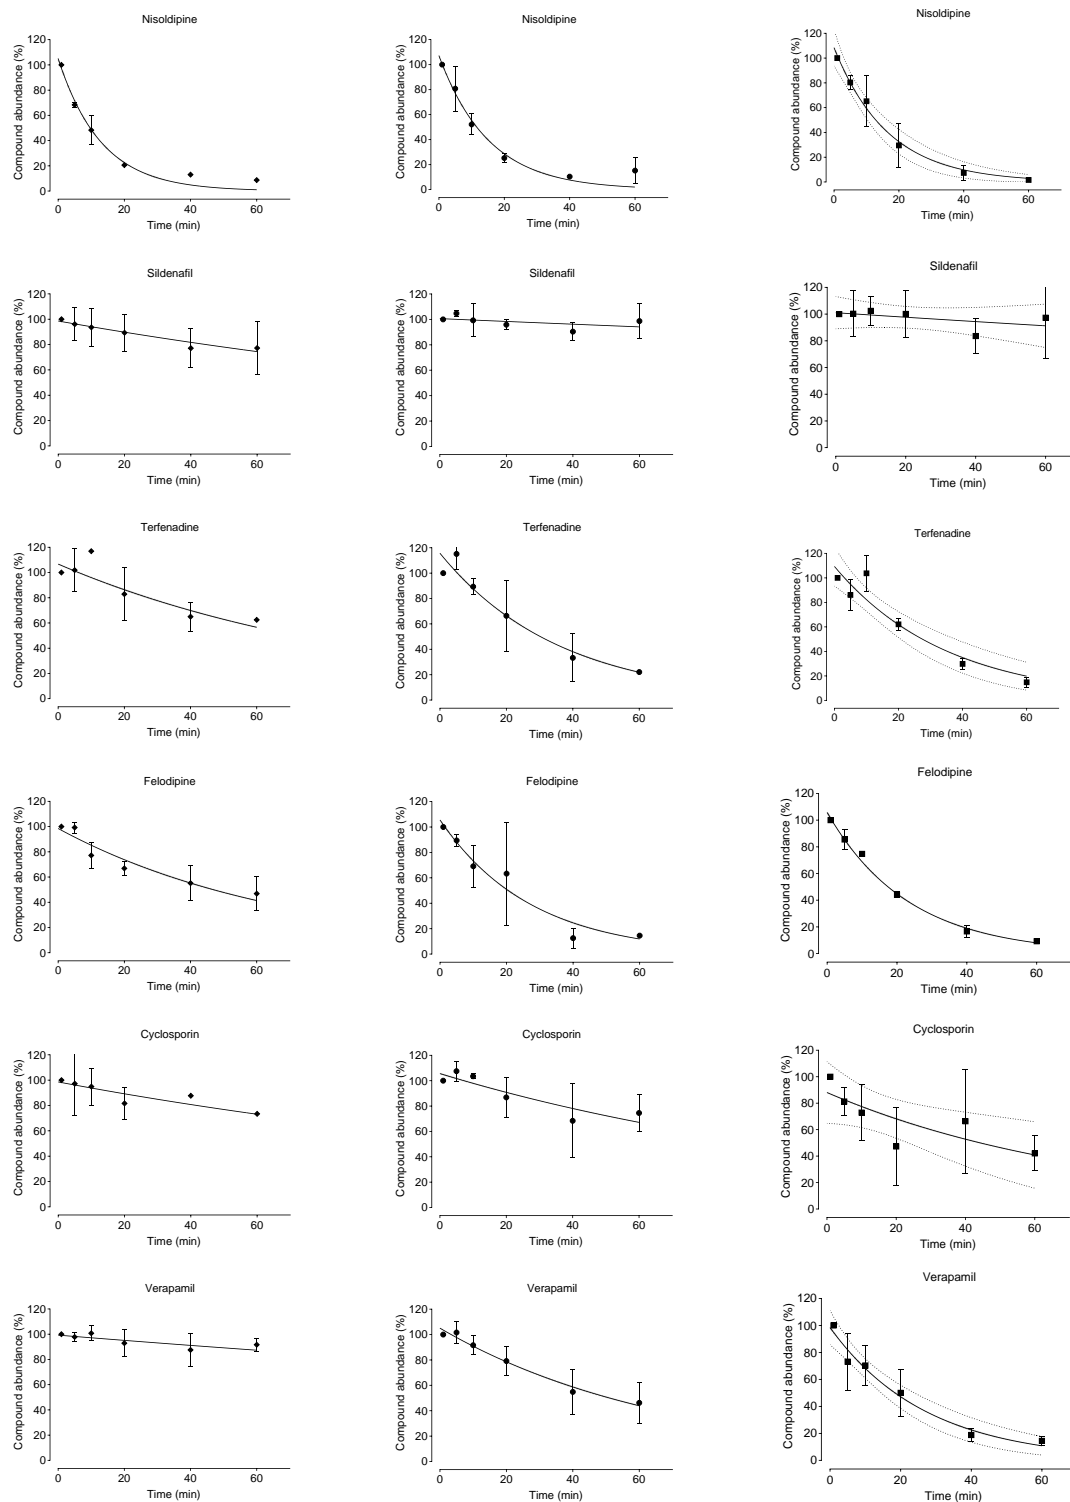

**Supplementary Fig. 5.**  $CL_{int}$  measurements for repaglinide, enalapril, s-mephenytoin, carbazeran, ramipril, and dabigatran etexilate in human intestinal microsomes (◆), permeabilized enterocytes (●), and mucosa (■), respectively.

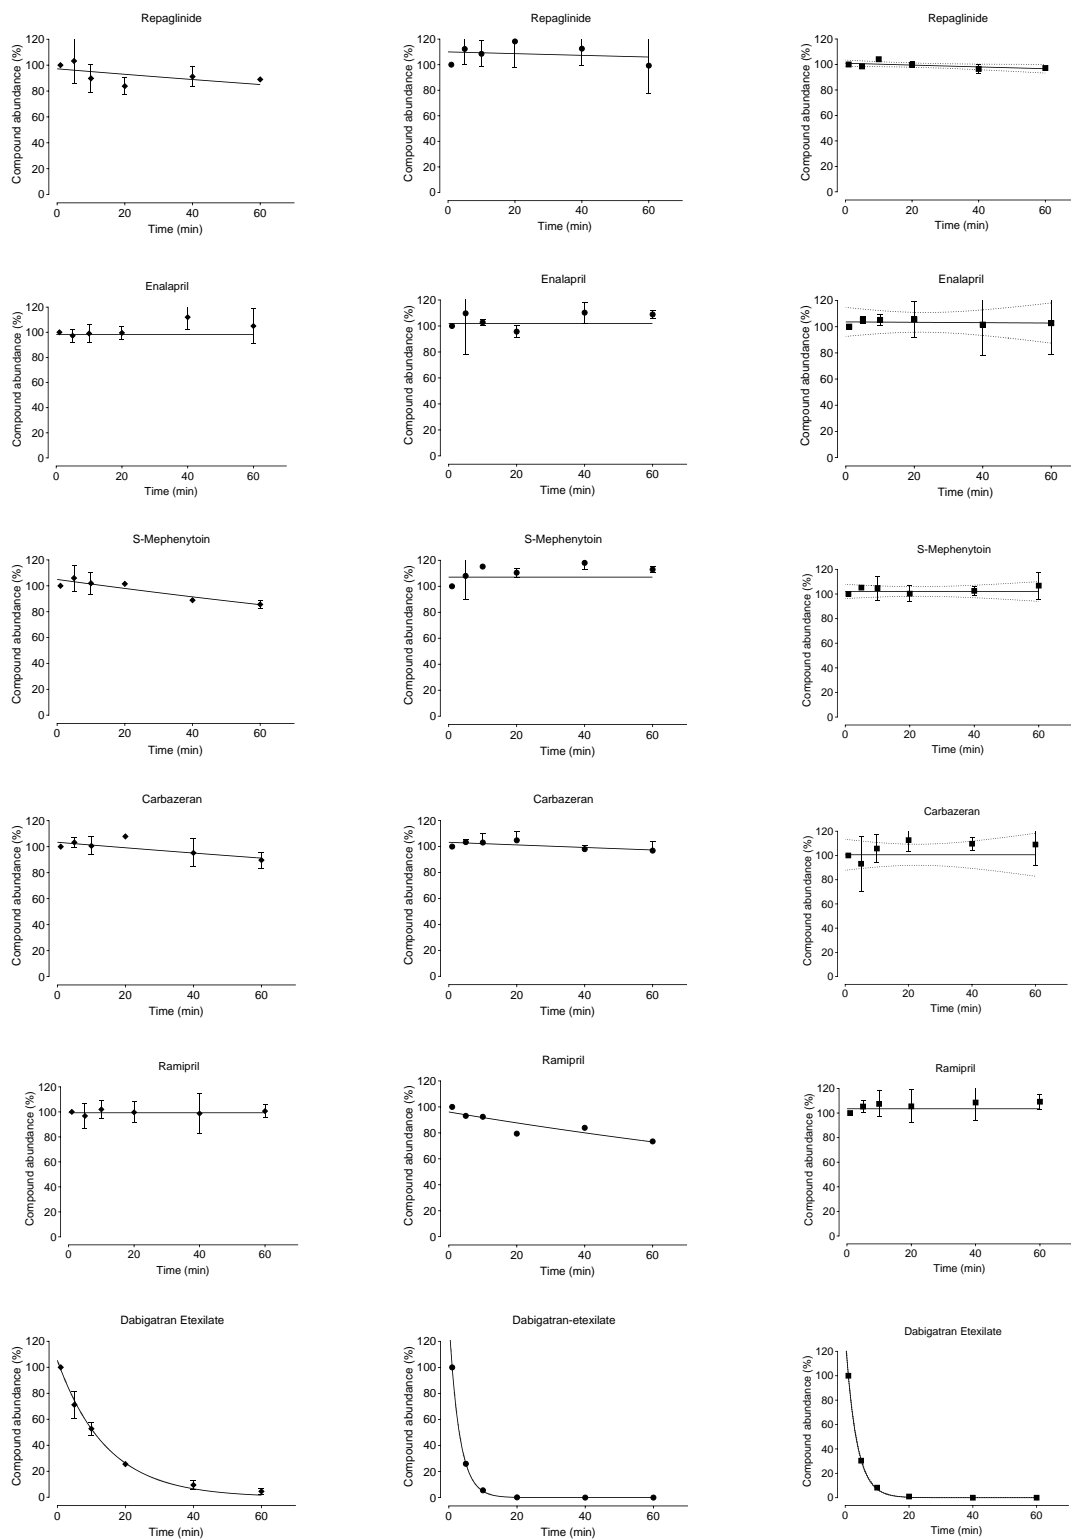

**Supplementary Fig. 6.**  $CL_{int}$  measurements for terbutaline and quinidine in human intestinal microsomes ( $\blacklozenge$ ), permeabilized enterocytes ( $\bullet$ ), and mucosa ( $\blacksquare$ ), respectively.

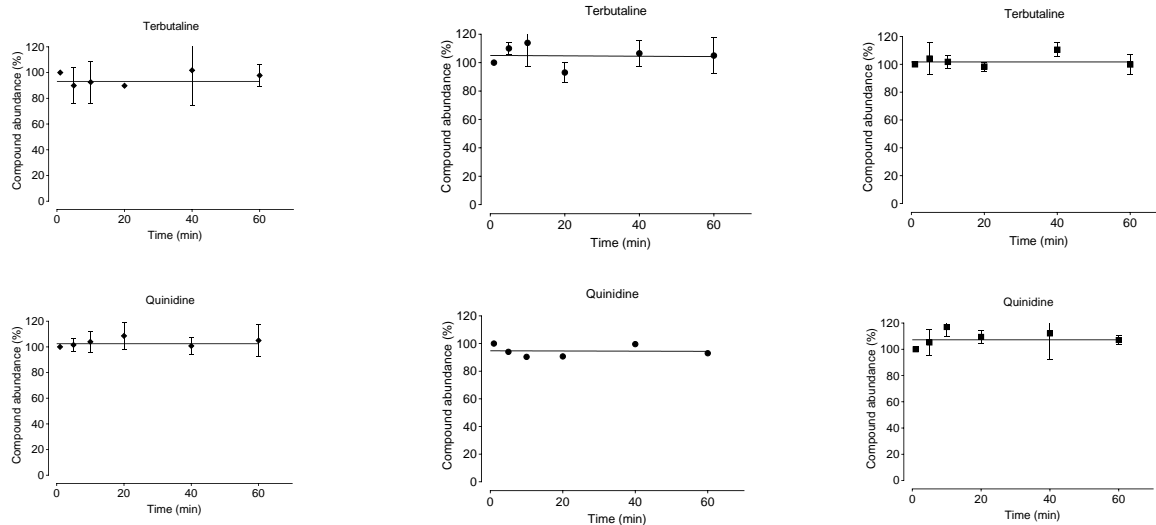



**Supplementary Fig. 7.** Examples of biotransformation pathway analysis *via* the QuanQual approach (LC-HRMS).

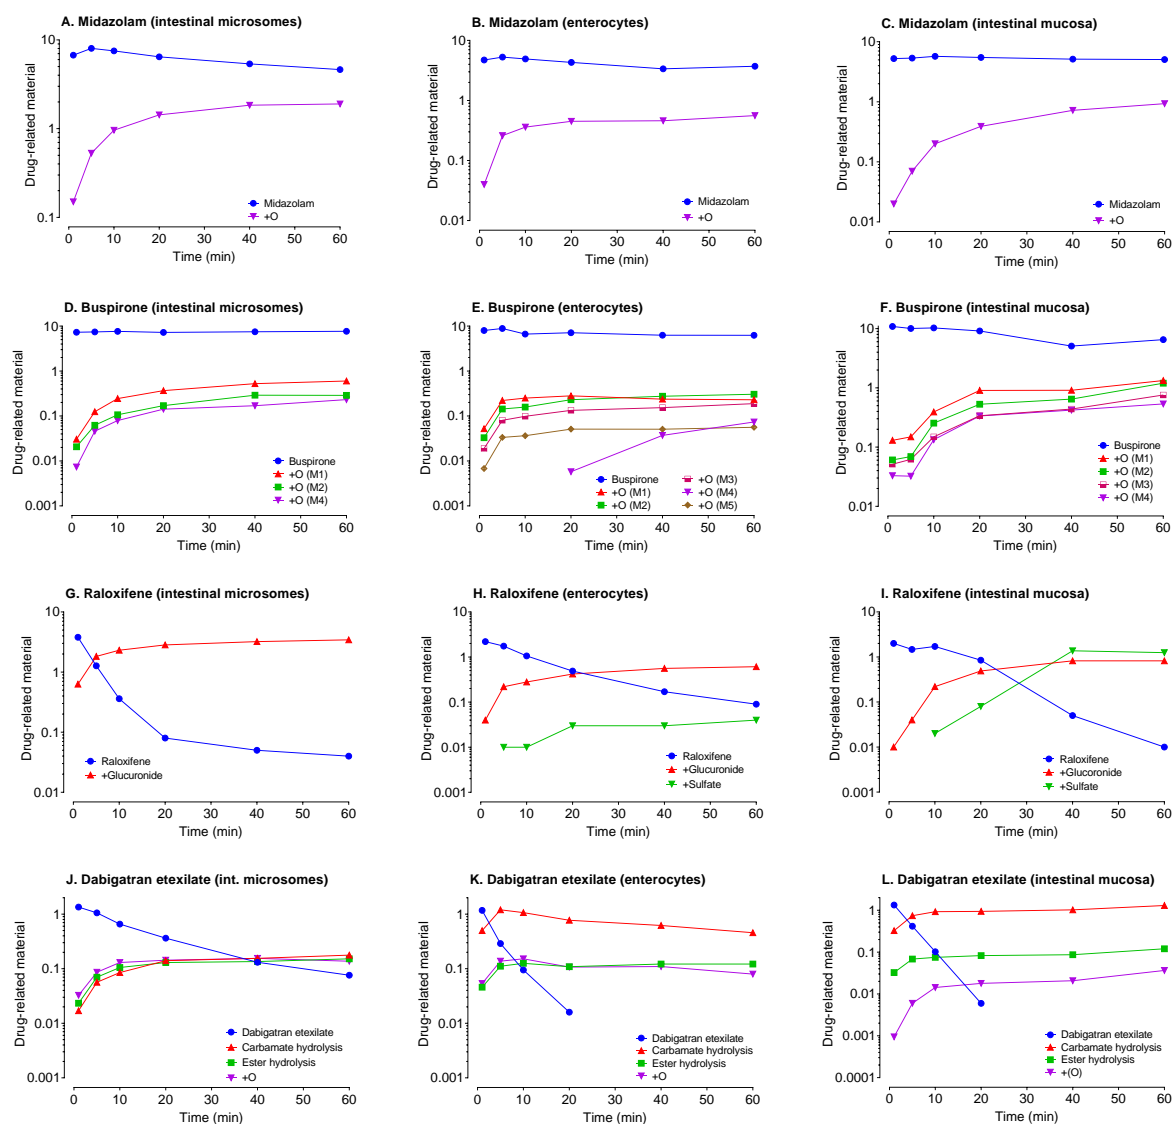

Supplement: 111_supplemental_data.pdf [file 111_supplemental_data.pdf]
